# Supplementary material
Source: MDPI journal article supplement (https://www.mdpi.com/1999-4907/12/5/583)
Supplement: s1 [file s1 › forests-1193810-supplementary.pdf]

## Supplementary material

Table S1. Forest stand average composition in major tree species (percentage of merchantable stand basal area) prior to harvesting, and merchantable basal area (means  $\pm$  standard deviation [SD]).

| Soil province* | Harvesting treatment† | N   | <i>Betula papyrifera</i> | <i>Picea glauca</i> | <i>Picea mariana</i> | <i>Pinus banksiana</i> | <i>Abies balsamea</i> | Other tree species | Merchantable basal area             |
|----------------|-----------------------|-----|--------------------------|---------------------|----------------------|------------------------|-----------------------|--------------------|-------------------------------------|
|                |                       |     | (% of basal area)        |                     |                      |                        |                       |                    | (m <sup>2</sup> ·ha <sup>-1</sup> ) |
| B              | SOH                   | 39  | 16                       | 11                  | 16                   | 15                     | 36                    | 6                  | 35 $\pm$ 10                         |
|                | WTH                   | 25  | 3                        | 11                  | 7                    | 12                     | 31                    | 36                 | 41 $\pm$ 8                          |
| C              | SOH                   | 39  | 11                       | 13                  | 18                   | 17                     | 24                    | 16                 | 26 $\pm$ 7                          |
|                | WTH                   | 30  | 14                       | 17                  | 22                   | 21                     | 13                    | 13                 | 20 $\pm$ 11                         |
| D              | SOH                   | 21  | 16                       | 18                  | 28                   | 15                     | 8                     | 16                 | 15 $\pm$ 7                          |
|                | WTH                   | 12  | 13                       | 16                  | 29                   | 17                     | 10                    | 16                 | 20 $\pm$ 7                          |
| E              | SOH                   | 11  | 16                       | 16                  | 16                   | 27                     | 11                    | 14                 | 25 $\pm$ 6                          |
|                | WTH                   | 19  | 10                       | 15                  | 31                   | 17                     | 16                    | 11                 | 22 $\pm$ 6                          |
| Average        | SOH                   | 110 | 12                       | 13                  | 17                   | 17                     | 27                    | 13                 | 26 $\pm$ 11                         |
|                | WTH                   | 86  | 13                       | 16                  | 22                   | 18                     | 15                    | 16                 | 21 $\pm$ 9                          |

\* Soil province: B = Appalachians, C = Laurentians, D = Abitibi Lowlands, E = Mistassini Highlands.

† Harvesting treatment: SOH = stem-only harvesting, WTH = whole-tree harvesting.

Table S2. Characteristics of the trees measured for site quality index evaluation at the time of soil sampling. Data presented are means  $\pm$  SD.

| Soil province*      | Harvesting treatment† | Species                | N   | DBH (cm)       | Age at DBH (yrs) | Height (m)     |
|---------------------|-----------------------|------------------------|-----|----------------|------------------|----------------|
| B                   | SOH                   | <i>Abies balsamea</i>  | 117 | 13.6 $\pm$ 2.4 | 22.1 $\pm$ 3.4   | 9.5 $\pm$ 1.1  |
|                     | WTH                   | <i>Abies balsamea</i>  | 75  | 12.4 $\pm$ 1.8 | 19.7 $\pm$ 2.0   | 8.0 $\pm$ 1.1  |
|                     | SOH                   | <i>Picea mariana</i>   | 76  | 13.7 $\pm$ 1.8 | 21.4 $\pm$ 2.6   | 8.5 $\pm$ 1.1  |
|                     | WTH                   | <i>Picea mariana</i>   | 64  | 13.1 $\pm$ 2.0 | 17.8 $\pm$ 2.4   | 7.6 $\pm$ 1.0  |
|                     | SOH                   | <i>Picea glauca</i>    | 47  | 14.1 $\pm$ 2.3 | 21.7 $\pm$ 3.7   | 9.1 $\pm$ 1.3  |
|                     | WTH                   | <i>Picea glauca</i>    | 46  | 12.5 $\pm$ 2.0 | 17.1 $\pm$ 2.2   | 7.3 $\pm$ 0.9  |
| C                   | SOH                   | <i>Abies balsamea</i>  | 71  | 13.5 $\pm$ 3.6 | 25.3 $\pm$ 5.3   | 10.4 $\pm$ 2.5 |
|                     | WTH                   | <i>Abies balsamea</i>  | 32  | 13.4 $\pm$ 4.4 | 26.0 $\pm$ 6.1   | 9.4 $\pm$ 3.1  |
|                     | SOH                   | <i>Pinus banksiana</i> | 6   | 14.4 $\pm$ 3.1 | 18.3 $\pm$ 1.6   | 8.8 $\pm$ 0.9  |
|                     | WTH                   | <i>Pinus banksiana</i> | 27  | 13.9 $\pm$ 1.7 | 19.4 $\pm$ 1.7   | 9.7 $\pm$ 0.9  |
|                     | SOH                   | <i>Picea mariana</i>   | 99  | 12.2 $\pm$ 2.0 | 23.2 $\pm$ 5.7   | 8.7 $\pm$ 1.4  |
|                     | WTH                   | <i>Picea mariana</i>   | 70  | 12.1 $\pm$ 3.4 | 26.3 $\pm$ 10    | 8.5 $\pm$ 2.0  |
| D                   | SOH                   | <i>Abies balsamea</i>  | 41  | 12.4 $\pm$ 2.2 | 25.7 $\pm$ 6.0   | 9.4 $\pm$ 1.7  |
|                     | WTH                   | <i>Abies balsamea</i>  | 7   | 12.5 $\pm$ 2.9 | 20.3 $\pm$ 3.5   | 7.6 $\pm$ 1.3  |
|                     | SOH                   | <i>Picea mariana</i>   | 59  | 12.0 $\pm$ 2.6 | 22.9 $\pm$ 5.3   | 8.5 $\pm$ 1.6  |
|                     | WTH                   | <i>Picea mariana</i>   | 33  | 10.3 $\pm$ 1.4 | 22.6 $\pm$ 6.9   | 7.1 $\pm$ 0.8  |
| E                   | SOH                   | <i>Abies balsamea</i>  | 2   | 9.9 $\pm$ 0.1  | 35.5 $\pm$ 10.6  | 8.1 $\pm$ 0.4  |
|                     | WTH                   | <i>Abies balsamea</i>  | 7   | 11.2 $\pm$ 1.2 | 29.7 $\pm$ 10.9  | 8.9 $\pm$ 1.7  |
|                     | SOH                   | <i>Pinus banksiana</i> | 30  | 14.3 $\pm$ 1.9 | 22.7 $\pm$ 1.7   | 11.0 $\pm$ 1.1 |
|                     | WTH                   | <i>Pinus banksiana</i> | 27  | 13.8 $\pm$ 2.0 | 21.5 $\pm$ 1.8   | 9.0 $\pm$ 1.8  |
|                     | SOH                   | <i>Picea mariana</i>   | 33  | 12.4 $\pm$ 1.9 | 24.5 $\pm$ 3.7   | 9.3 $\pm$ 1.0  |
|                     | WTH                   | <i>Picea mariana</i>   | 52  | 9.4 $\pm$ 2.4  | 22.6 $\pm$ 5.2   | 7.2 $\pm$ 1.7  |
| Average per species | SOH                   | <i>Abies balsamea</i>  | 231 | 13.3 $\pm$ 2.8 | 23.8 $\pm$ 5.0   | 9.7 $\pm$ 1.8  |
|                     | WTH                   | <i>Abies balsamea</i>  | 121 | 12.6 $\pm$ 2.8 | 22.0 $\pm$ 5.4   | 8.4 $\pm$ 2.0  |
|                     | SOH                   | <i>Pinus banksiana</i> | 36  | 14.1 $\pm$ 2.1 | 21.8 $\pm$ 2.4   | 10.4 $\pm$ 1.5 |
|                     | WTH                   | <i>Pinus banksiana</i> | 54  | 13.6 $\pm$ 2.0 | 20.1 $\pm$ 2.5   | 9.2 $\pm$ 1.5  |
|                     | SOH                   | <i>Picea mariana</i>   | 267 | 12.6 $\pm$ 2.2 | 22.8 $\pm$ 4.7   | 8.7 $\pm$ 1.3  |
|                     | WTH                   | <i>Picea mariana</i>   | 219 | 11.5 $\pm$ 2.9 | 22.4 $\pm$ 7.6   | 7.7 $\pm$ 1.6  |
|                     | SOH                   | <i>Picea glauca</i>    | 47  | 14.1 $\pm$ 2.3 | 21.7 $\pm$ 3.7   | 9.1 $\pm$ 1.3  |
|                     | WTH                   | <i>Picea glauca</i>    | 46  | 12.5 $\pm$ 2.0 | 17.1 $\pm$ 2.2   | 7.3 $\pm$ 0.9  |
| Average             | SOH                   |                        | 581 | 13.1 $\pm$ 2.5 | 23.1 $\pm$ 4.7   | 9.3 $\pm$ 1.7  |
|                     | WTH                   |                        | 440 | 12.2 $\pm$ 2.8 | 21.5 $\pm$ 6.4   | 8.1 $\pm$ 1.8  |

\* Soil province: B = Appalachians, C = Laurentians, D = Abitibi Lowlands, E =Mistassini Highlands.

† Harvesting treatment: SOH =stem-only harvesting, WTH =whole-tree harvesting.

Table S3. Parameter estimates of the relationship between soil bulk density ( $D_b$ ) and organic matter (OM) concentration according to great soil texture groups. No significant difference was found between the Sand and the Loam model ( $F = -1.34$ ,  $P = 1$ ), so these data were fused.

| Parameter                                                 | Estimate | SE    | $t$ value | $P$    |
|-----------------------------------------------------------|----------|-------|-----------|--------|
| Sand and loam                                             |          |       |           |        |
| $D_{bm}$                                                  | 1.532    | 0.049 | 31.2      | <0.001 |
| $D_{bo}$                                                  | 0.111    | 0.006 | 18.6      | <0.001 |
| Residual standard error: 0.2335 on 522 d.f.; $R^2 = 0.38$ |          |       |           |        |
| Clay                                                      |          |       |           |        |
| $D_{bm}$                                                  | 2.152    | 0.253 | 8.5       | <0.001 |
| $D_{bo}$                                                  | 0.109    | 0.011 | 10.2      | <0.001 |
| Residual standard error: 0.1438 on 39 d.f.; $R^2 = 0.66$  |          |       |           |        |

NOTE: The modeled relationships are represented by the following equation (Federer *et al.*, 1993):

$$D_b = \frac{D_{bm} \times D_{bo}}{F_o \times D_{bm} + (1 - F_o) \times D_{bo}}$$

where  $D_b$  represents observed bulk density ( $\text{g}\cdot\text{cm}^{-3}$ ),

$D_{bm}$  is a constant for bulk density of “pure” mineral soil (without organic matter) ( $\text{g}\cdot\text{cm}^{-3}$ ),

$D_{bo}$  is a constant for bulk density of “pure” organic matter (without mineral matter) ( $\text{g}\cdot\text{cm}^{-3}$ ),

$F_o$  is the proportion of organic matter (%/100).

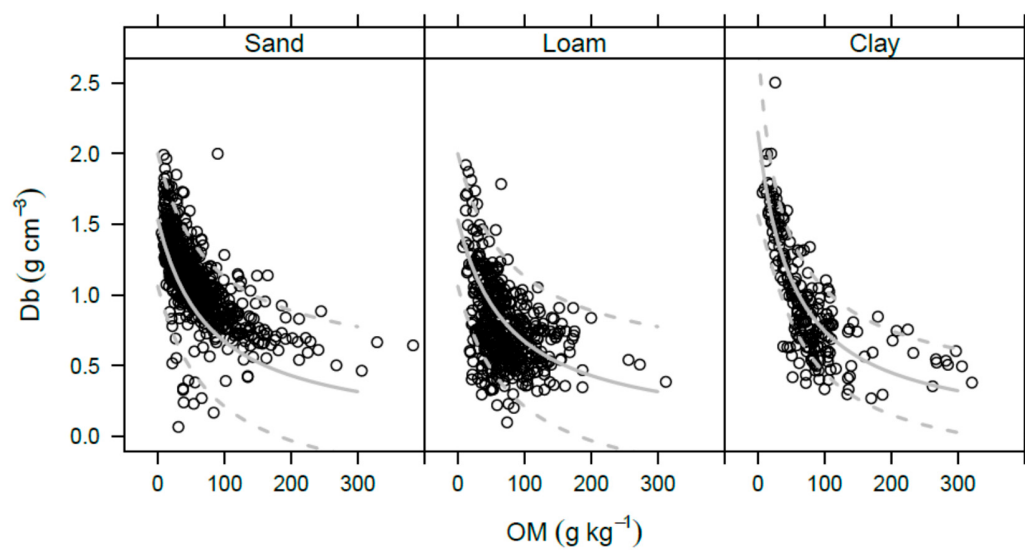

Figure S1. Relationship between soil bulk density (Db) and organic matter (OM) concentration according to great soil texture groups. Lines show model predicted values and 95% confidence interval predictions.

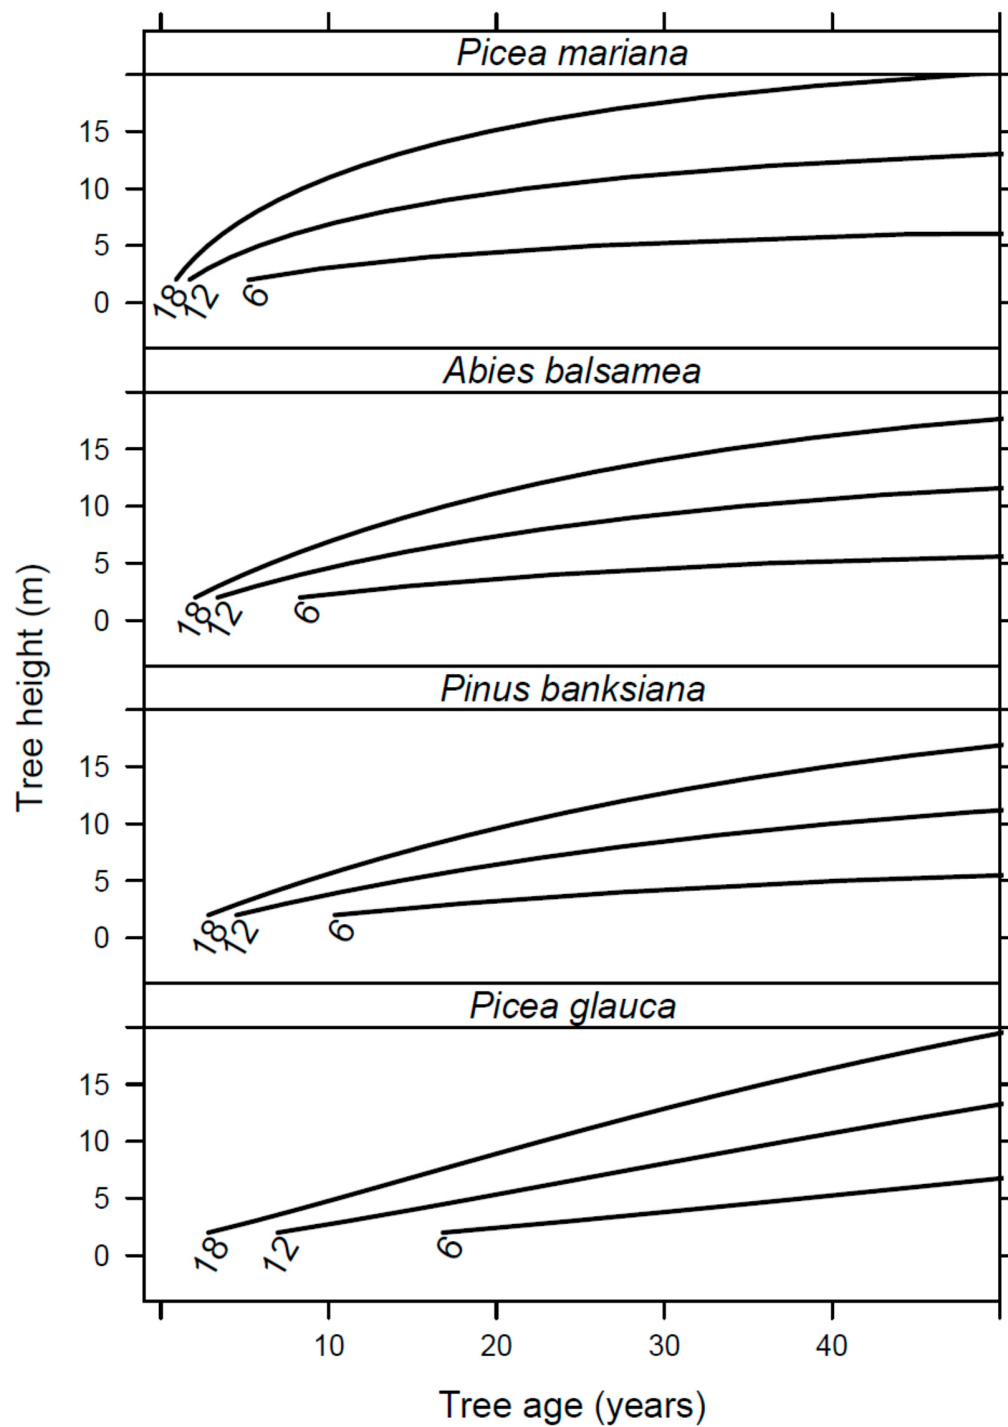

Figure S2. Expected tree height as a function of tree age (at DBH height) for various site quality index (SQI) values. Data is derived from the models of Pothier and Savard [45] for *Picea mariana*, *Abies balsamea*, and *Pinus banksiana*, and of Pr gent [46] for *Picea glauca*.

Table S4. Estimated biomass and mineralomass left on the ground after stem-only harvesting (SOH) in the 4 soil provinces, based on tree surveys before harvesting. Data presented are model adjusted means  $\pm$  standard errors. Within columns, means with the same letters are not different at  $p = 0.05$ .

| Soil province*           | Biomass<br>(Mg·ha <sup>-1</sup> ) | N                      | P                | K            | Ca            | Mg               |
|--------------------------|-----------------------------------|------------------------|------------------|--------------|---------------|------------------|
|                          |                                   | (kg·ha <sup>-1</sup> ) |                  |              |               |                  |
| B                        | 28 $\pm$ 1c                       | 240 $\pm$ 12c          | 32.8 $\pm$ 1.9c  | 119 $\pm$ 5c | 137 $\pm$ 7c  | 23.2 $\pm$ 1.2c  |
| C                        | 21 $\pm$ 1b                       | 170 $\pm$ 12b          | 23.9 $\pm$ 1.8b  | 87 $\pm$ 6b  | 103 $\pm$ 8b  | 18.9 $\pm$ 1.3b  |
| D                        | 14 $\pm$ 1a                       | 104 $\pm$ 12a          | 14.3 $\pm$ 2.0a  | 55 $\pm$ 7a  | 65 $\pm$ 9a   | 12.1 $\pm$ 1.5a  |
| E                        | 20 $\pm$ 2ab                      | 142 $\pm$ 16ab         | 17.0 $\pm$ 2.6ab | 66 $\pm$ 9ab | 79 $\pm$ 12ab | 16.2 $\pm$ 2.0ab |
| Average                  | 21 $\pm$ 1                        | 184 $\pm$ 7            | 24.3 $\pm$ 1.0   | 89 $\pm$ 3   | 104 $\pm$ 4   | 18.7 $\pm$ 0.7   |
| <i>P</i> (Soil province) | <0.001                            | <0.001                 | <0.001           | <0.001       | <0.001        | <0.001           |

\* Soil provinces: B = Appalachians, C = Laurentians, D = Abitibi Lowlands, E = Mistassini Highlands.

## Soil province: B

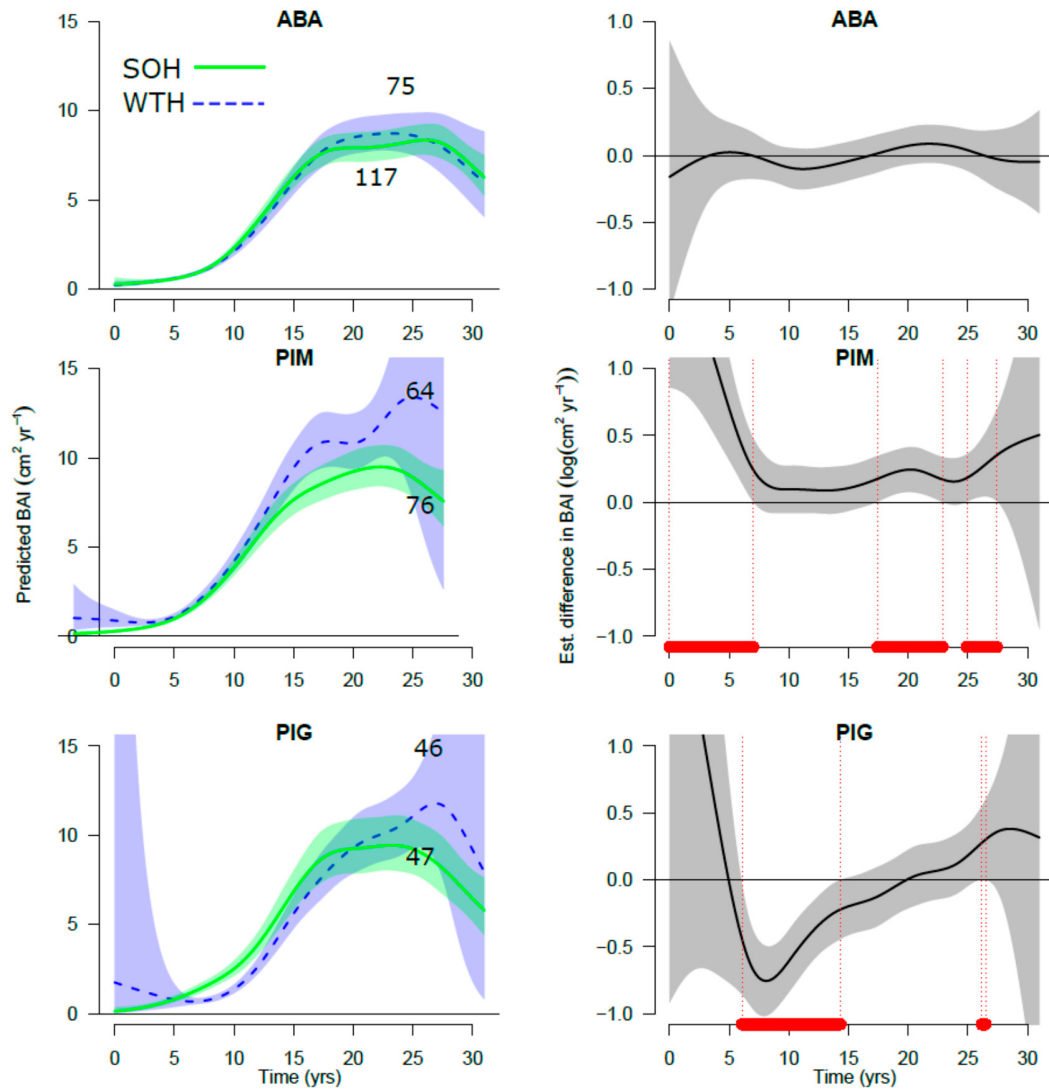

Figure S3. Left panels: Predicted basal area increment (BAI) of individual regenerating tree species (ABA = *Abies balsamea*, PIM = *Picea mariana*, FIG = *Picea glauca*) over time after harvesting treatment (stem-only harvesting [SOH] and whole-tree harvesting [WTH]) in the soil province B (Appalachians). Data presented are model averages (lines) and simultaneous 95<sup>th</sup> centile confidence intervals (bands) (95%CI). Numbers of samples are displayed for each treatment. Right panels: Estimated difference in BAI (log values, simultaneous 95% CI) between WTH and SOH (WTH minus SOH) smoothed curves. Periods during which treatments differ significantly are highlighted with a red line on the X axis.

## Soil province: C

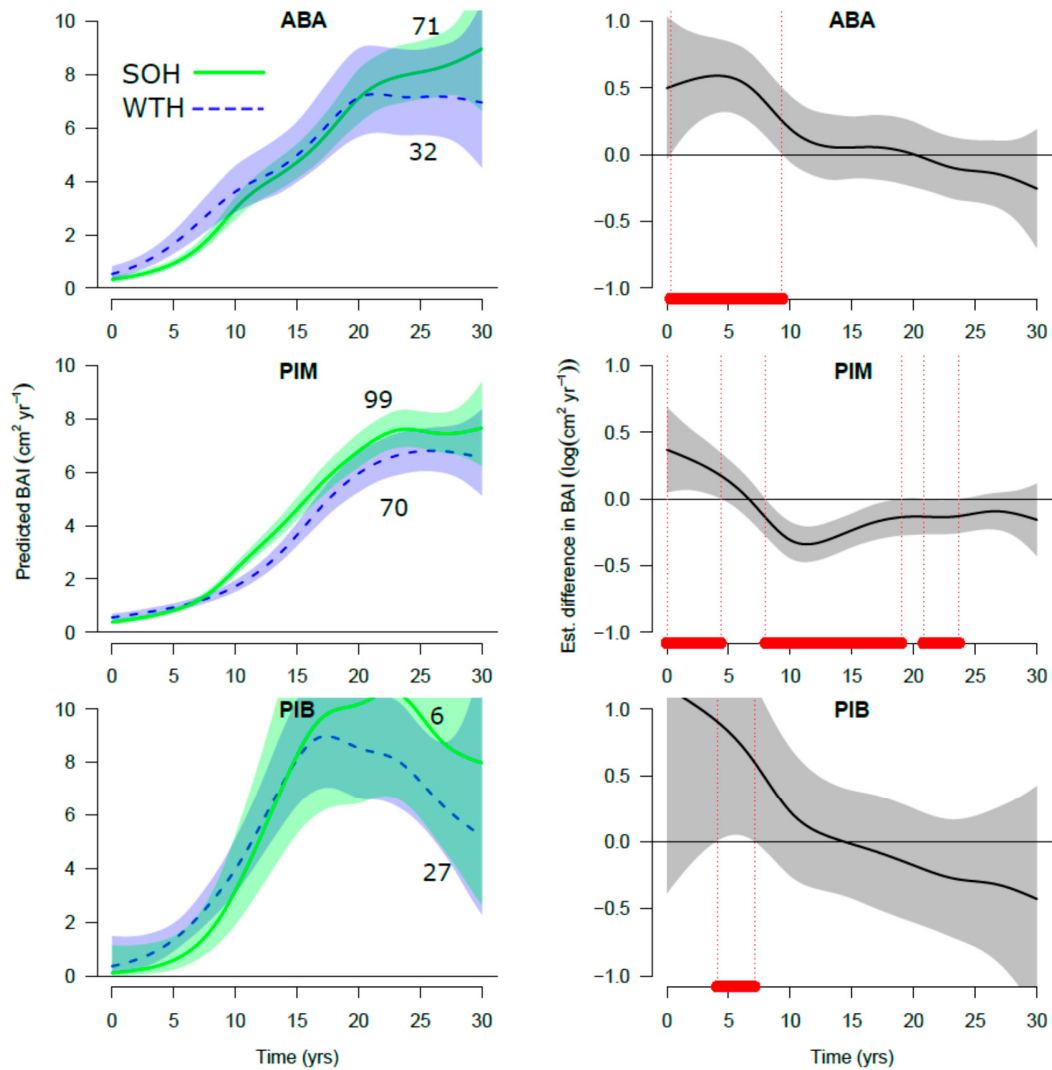

Figure S4. Left panels: Predicted basal area increment (BAI) of individual regenerating tree species (ABA = *Abies balsamea*, PIM = *Picea mariana*, PIB = *Pinus banksiana*) over time after harvesting treatment (stem-only harvesting [SOH] and whole-tree harvesting [WTH]) in the soil province C (Laurentians). Data presented are model averages (lines) and simultaneous 95<sup>th</sup> centile confidence intervals (bands) (95% CI). Numbers of samples are displayed for each treatment. Right panels: Estimated difference in BAI (log values, simultaneous 95% CI) between WTH and SOH (WTH minus SOH) smoothed curves. Periods during which treatments differ significantly are highlighted with a red line on the X axis.

## Soil province: D

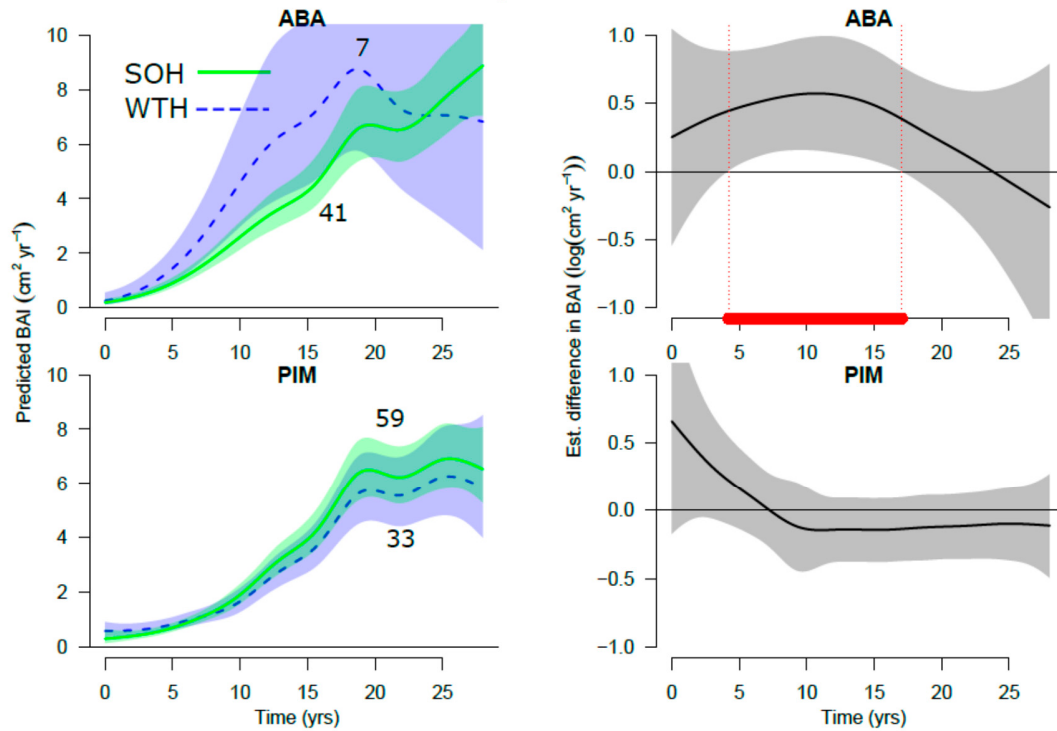

Figure S5. Left panels: Predicted basal area increment (BAI) of individual regenerating tree species (ABA = *Abies balsamea*, PIM *Picea mariana*) over time after harvesting treatment (stem-only harvesting [SOH] and whole-tree harvesting [WTH]) in the soil province D (Abitibi Lowlands). Data presented are model averages (lines) and simultaneous confidence 95<sup>th</sup> centile intervals (bands) (95% CI). Numbers of samples are displayed for each treatment. Right panels: Estimated difference in BAI (log values, simultaneous 95% CI) between WTH and SOH (WTH minus SOH) smoothed curves. Periods during which treatments differ significantly are highlighted with a red line on the X axis.

## Soil province: E

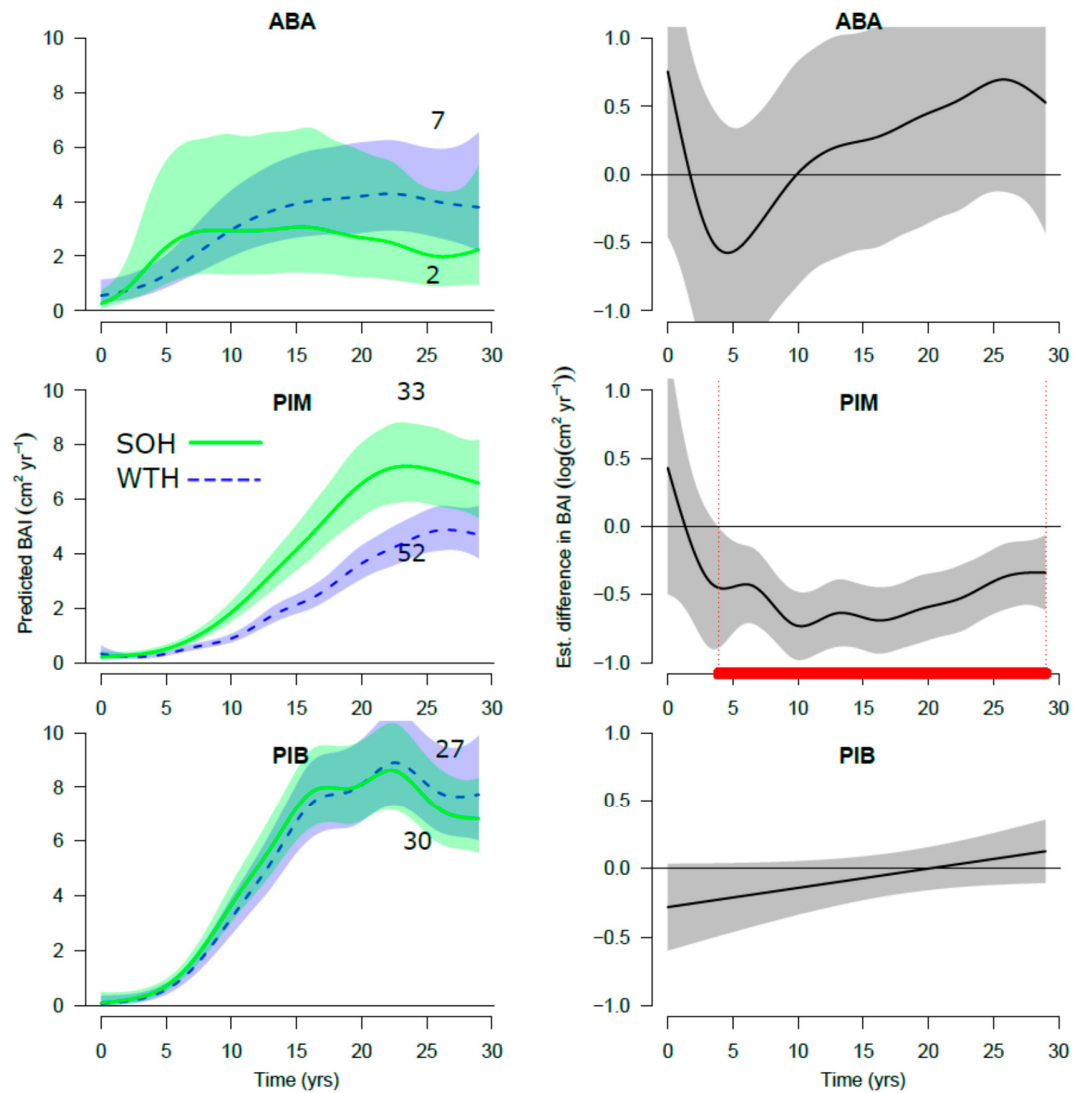

Figure S6. Left panels: Predicted basal area increment (BAI) of individual regenerating tree species (ABA = *Abies balsamea*, PIM = *Picea mariana*, PIB = *Pinus banksiana*) over time after harvesting treatment (stem-only harvesting [SOH] and whole-tree harvesting [WTH]) in the soil province E (Mistassini Highlands). Data presented are model averages (lines) and simultaneous 95<sup>th</sup> centile confidence intervals (bands) (95% CI). Numbers of samples are displayed for each treatment. Right panels: Estimated difference in BAI (log values, 95% CI) between WTH and SOH (WTH minus SOH) smoothed curves. Periods during which treatments differ significantly are highlighted with a red line on the X axis.

## Reference

Federer, C.A., Turcotte, D.E., Smith, C.T., 1993. The organic fraction-bulk density relationship and the expression of nutrient content in forest soils. *Can. J. For. Res.* 23, 1026-1032.
